# Supplementary material
Source: Elsevier journal article supplement (https://www.sciencedirect.com/science/article/pii/S2531043722002525)

**Supplement**

**Identification by cluster analysis of patients with asthma and nasal symptoms using the MASK-air® app**

**Data analysis: Full description**

When responding to the MASK-air® daily monitoring questionnaire, it is not possible to skip any question, and data are saved to the dataset only after the final answer. This precludes any missing data.

Continuous variables were compared across samples using the Kruskal-Wallis test, while categorical variables were compared using the Chi-Square test. Statistical significance was defined at *P*<0.05, with the Bonferroni correction applied for multiple comparisons. All analyses were performed using the software R (version 4.0.0).

**Main clustering analysis approach**

In each sample, k-means cluster analysis methods were applied to identify patterns of MASK-air® users according to self-reported asthma (i.e., whether the patient self-reported to having asthma or not), use of asthma medication (considering the number of times each patient reported the use of asthma medication) and VAS asthma (considering the three highest values of VAS asthma reported by patients). A two-step clustering approach was adopted. First, we clustered the data in each sample, applying k-means clustering algorithms (with the optimal number of clusters defined based on the silhouette coefficient24 – Supplementary Figure 1). Second, as there could be potentially relevant subgroups within each cluster, we applied k-means clustering algorithms to data within each cluster (using the silhouette coefficient, and as long as a silhouette score of over 0.5 was observed). Variables were scaled prior to clustering by computation of z-scores.

Obtained clusters were then assessed and compared regarding the frequency of users self-reporting to have asthma, the use of asthma medications, median VAS asthma levels and CARAT levels. Obtained clusters were also compared regarding (i) demographic and clinical characteristics, (ii) the combined symptom-medication score (CSMS) assessing the daily control of allergic rhinitis, 25 (iii) allergic rhinitis medication and (iv) VASs on the reported impact of global allergy symptoms (“VAS global”), on dyspnoea symptoms, eye symptoms, nose symptoms, allergy symptoms at work and allergy symptoms during sleep.

**Alternative clustering analysis approach**

As k-means cluster analysis methods should be applied using continuous variables only, and since one of our variables – self-reported asthma – was categorical/dichotomous, we performed an additional analysis with k-means clustering algorithms separately applied to users who self-reported asthma and to users who did not self-report asthma. The optimal number of clusters was based on the silhouette coefficient.24

**Validation of the results of the main clustering approach**

In Twinning participants who reported at least three days of MASK-air® use, clusters obtained with the main clustering approach were compared with physician-indicated asthma status (“current asthma”, “past asthma” or “no current or past asthma”).

**Supplementary Table 1. Demographic characteristics of MASK-air® users in each sample**

|  | **Sample 1 (*N*=466)** | **Sample 2 (*N*=3797)** | **Sample 3 (*N*=8075)** |
| --- | --- | --- | --- |
| Females – *N* (%) | 313 (67.2) | 2162 (56.9) | 4813 (59.6) |
| Age – mean (SD) | 38.9 (13.1) | 37.2 (13.7) | 36.1 (13.4) |
| Country – *N* (%) |  |  |  |
| Argentina | 13 (2.7) | 59 (1.6) | 148 (1.8) |
| Australia | 3 (0.6) | 37 (1.0) | 87 (1.1) |
| Austria | 7 (1.5) | 91 (2.4) | 210 (2.6) |
| Belgium | 6 (1.3) | 26 (0.7) | 76 (0.9) |
| Brazil | 14 (3.0) | 143 (3.8) | 518 (6.4) |
| Canada | 1 (0.2) | 4 (0.1) | 21 (0.3) |
| Czech Republic | 5 (1.1) | 13 (0.3) | 35 (0.4) |
| Denmark | 2 (0.4) | 17 (0.4) | 601 (7.4) |
| Finland | 10 (2.1) | 50 (1.3) | 127 (1.6) |
| France | 28 (6.0) | 214 (5.6) | 499 (6.2) |
| Germany | 29 (6.2) | 265 (7.0) | 601 (7.4) |
| Great Britain | 8 (1.7) | 66 (1.7) | 228 (2.8) |
| Greece | 22 (4.7) | 120 (3.2) | 258 (3.2) |
| Italy | 32 (6.9) | 478 (12.6) | 790 (9.8) |
| Japan | 18 (3.9) | 55 (1.4) | 149 (1.8) |
| Lithuania | 46 (9.9) | 349 (9.2) | 604 (7.5) |
| Mexico | 63 (13.5) | 768 (20.2) | 1245 (15.4) |
| Netherlands | 16 (3.4) | 138 (3.6) | 438 (5.4) |
| Poland | 30 (6.4) | 247 (6.5) | 513 (6.4) |
| Portugal | 37 (7.9) | 224 (5.9) | 653 (8.1) |
| Slovenia | 3 (0.6) | 7 (0.2) | 41 (0.5) |
| Spain | 32 (6.9) | 251 (6.6) | 471 (5.8) |
| Sweden | 10 (2.1) | 40 (1.0) | 72 (0.9) |
| Switzerland | 8 (1.7) | 63 (1.7) | 207 (2.6) |
| Turkey | 23 (4.9) | 104 (2.7) | 241 (3.0) |

**Supplementary Table 2. Description of the four asthma-related clusters and respective subgroups obtained using a two-step k-means approach in samples 1 and 3**

| **A. Sample 1: Patients reporting VAS asthma in at least 3 different months who have answered at least once to CARAT** | | | | | | | |
| --- | --- | --- | --- | --- | --- | --- | --- |
|  | **Cluster A**  **(“Treated uncontrolled asthma”)** | **Cluster B1**  **(“Treated partly controlled asthma”)** | **Cluster B2**  **(“Treated controlled asthma”)** | **Cluster C**  **(“Untreated uncontrolled asthma”)** | **Cluster D1**  **(“Untreated partly controlled asthma”)** | **Cluster D2**  **(“Untreated controlled asthma”)** | **Cluster D3**  **(“No evidence of asthma”)** |
| *N* (%) | 75 (16.1) | 45 (9.7) | 24 (5.2) | 90 (19.3) | 47 (10.1) | 31 (6.7) | 154 (33.0) |
| Reported days – *N* (average days per user) | 8888 (118.5) | 7165 (159.2) | 1901 (79.2) | 7646 (85.0) | 6218 (132.3) | 1685 (54.4) | 13,827 (89.8) |
| Females* | 62 (82.7) | 29 (64.4) | 17 (70.8) | 58 (64.4) | 25 (53.2) | 23 (74.2) | 99 (64.3) |
| Age‖ | 41.1 (11.2) | 39.1 (11.6) | 43.5 (10.7) | 39.2 (14.0) | 39.1 (12.1) | 37.2 (14.7) | 37.1 (13.8) |
| Self-reported asthma* | 72 (96.0) | 42 (93.3) | 22 (91.7) | 45 (50.0) | 4 (8.5) | 31 (100) | 0 |
| Asthma medication reporting* |  |  |  |  |  |  |  |
| 0 days | 0 | 0 | 0 | 79 (87.8) | 46 (97.9) | 27 (87.1) | 153 (99.4) |
| 1 day | 0 | 0 | 0 | 11 (12.2) | 1 (2.1) | 4 (12.9) | 1 (0.6) |
| 2 days | 7 (9.3) | 6 (13.3) | 3 (12.5) | 0 | 0 | 0 | 0 |
| 3 or more days | 68 (90.7) | 39 (86.7) | 21 (87.5) | 0 | 0 | 0 | 0 |
| Total days reporting asthma medication* |  |  |  |  |  |  |  |
| SABA | 1379 (15.5) | 390 (5.4) | 188 (9.9) | 9 (0.1) | 0 | 7 (0.4) | 0 |
| LABA+ICS | 3916 (44.1) | 2811 (39.2) | 558 (29.4) | 8 (0.1) | 0 | 1 (0.1) | 1 (0.01) |
| ICS | 1168 (13.1) | 1053 (14.7) | 390 (20.5) | 3 (0.04) | 0 | 0 | 0 |
| OCS a | 507 (5.7) | 22 (0.3) | 19 (1.0) | 61 (0.8) | 1 (0.02) | 1 (0.1) | 29 (0.2) |
| LAMA | 651 (7.3) | 440 (6.1) | 16 (0.8) | 0 | 0 | 0 | 0 |
| Biologics | 7 (0.1) | 4 (0.1) | 2 (0.1) | 0 | 0 | 0 | 0 |
| VAS asthma |  |  |  |  |  |  |  |
| Maximum value† | 85 (19) | 52 (13) | 27 (16) | 74 (25) | 44 (21) | 23 (17) | 6 (11) |
| Three highest values† | 73 (19) | 41 (14) | 17 (13) | 61 (28) | 22 (11) | 12 (17) | 3 (7) |
| Days with VAS asthma >50* | 1392 (15.7) | 35 (0.5) | 0 | 1057 (13.8) | 17 (0.3) | 0 | 0 |
| Maximum VAS dyspnea† | 68 (27) | 36 (30) | 19 (24) | 59 (41) | 28 (21) | 14 (20) | 11 (21) |
| CARAT asthma (questions 5-7)† | 5 (5) | 8 (2) | 7 (3) | 6 (3) | 9 (2) | 9 (2) | 9 (1) |
| Presence of asthma symptoms b * | 50 (66.7) | 19 (42.2) | 8 (33.3) | 52 (57.8) | 9 (19.1) | 7 (22.6) | 20 (13.0) |
| CARAT (questions1-10)† | 13 (8) | 20 (9) | 21 (6) | 15 (8) | 20 (9) | 20 (7) | 20 (7) |
| Uncontrolled c * | 73 (97.3) | 36 (80.0) | 21 (87.5) | 81 (90.0) | 34 (72.3) | 23 (74.2) | 117 (76.0) |
| CSMS† | 68 (19) | 43 (17) | 30 (11) | 63 (19) | 52 (21) | 28 (25) | 38 (26) |
| Maximum VAS global† | 84 (22) | 58 (25) | 43 (15) | 87 (29) | 78 (27) | 42 (40) | 64 (39) |
| Maximum VAS eyes† | 78 (32) | 48 (36) | 28 (32) | 76 (33) | 58 (35) | 30 (34) | 47 (55) |
| Maximum VAS nose† | 86 (28) | 63 (30) | 47 (23) | 88 (25) | 82 (26) | 55 (50) | 68 (45) |
| Maximum VAS work† | 61 (30) | 34 (37) | 19 (32) | 62 (39) | 46 (45) | 29 (39) | 29 (41) |
| Maximum VAS sleep† | 87 (27) | 71 (32) | 51 (52) | 86 (30) | 73 (31) | 42 (58) | 66 (45) |
| Total days reporting rhinitis medication* |  |  |  |  |  |  |  |
| Oral antihistamines monotherapy | 1199 (13.5) | 842 (11.8) | 92 (4.8) | 710 (9.3) | 588 (9.5) | 109 (6.5) | 1743 (12.6) |
| Intranasal steroids monotherapy | 361 (4.1) | 674 (9.4) | 94 (4.9) | 378 (4.9) | 323 (5.2) | 60 (3.6) | 393 (2.8) |
| Azelastine-fluticasone monotherapy | 346 (3.9) | 470 (6.6) | 73 (3.8) | 107 (1.4) | 385 (6.2) | 9 (0.5) | 615 (4.4) |
| Oral antihistamines + intranasal steroids | 2087 (23.5) | 1237 (17.3) | 484 (25.5) | 454 (5.9) | 184 (3.0) | 136 (8.1) | 689 (5.0) |
| Azelastine-fluticasone + other rhinitis medication | 878 (9.9) | 845 (11.8) | 5 (0.3) | 125 (1.6) | 266 (4.3) | 37 (2.2) | 217 (1.6) |
| Conjunctivitis* | 68 (90.7) | 32 (71.1) | 17 (70.8) | 66 (73.3) | 38 (80.9) | 26 (83.9) | 119 (77.3) |
| Sensitisation d * |  |  |  |  |  |  |  |
| Monosensitisation d | 8 (11.4) | 6 (13.6) | 0 | 8 (9.1) | 5 (10.9) | 3 (10.0) | 23 (15.2) |
| Polysensitisation d | 51 (72.9) | 25 (56.8) | 15 (62.5) | 51 (58.0) | 27 (58.7) | 19 (63.3) | 86 (57.0) |
| **B. Sample 3: All patients with at least 3 VAS asthma** | | | | | | | |
|  | **Cluster A**  **(“Treated uncontrolled asthma”)** | **Cluster B1**  **(“Treated partly controlled asthma”)** | **Cluster B2**  **(“Treated controlled asthma”)** | **Cluster C**  **(“Untreated uncontrolled asthma”)** | **Cluster D1**  **(“Untreated partly controlled asthma”)** | **Cluster D2**  **(“Untreated controlled asthma”)** | **Cluster D3**  **(“No evidence of asthma”)** |
| *N* (%) | 957 (11.9) | 496 (6.1) | 441 (5.5) | 1468 (18.2) | 858 (10.6) | 612 (7.6) | 3243 (40.2) |
| Reported days – *N* (average days per user) | 52,649 (55.0) | 28,264 (57.0) | 16,204 (36.7) | 54,438 (37.1) | 34,094 (39.7) | 13,217 (21.6) | 98,303 (30.3) |
| Females* | 675 (70.5) | 309 (62.3) | 253 (57.4) | 907 (61.8) | 470 (54.8) | 343 (56.0) | 1741 (53.7) |
| Age‖ | 39.5 (13.5) | 39.4 (14.0) | 37.1 (13.5) | 37.1 (13.6) | 36.4 (13.1) | 34.3 (13.0) | 34.2 (12.8) |
| Self-reported asthma* | 875 (91.4) | 443 (89.3) | 311 (70.5) | 680 (46.3) | 151 (17.6) | 612 (100) | 0 |
| Asthma medication reporting* |  |  |  |  |  |  |  |
| 0 days | 0 | 0 | 0 | 1316 (89.6) | 833 (97.1) | 546 (89.2) | 3225 (99.4) |
| 1 day | 6 (0.6) | 0 | 0 | 152 (10.4) | 25 (2.9) | 66 (10.8) | 18 (0.6) |
| 2 days | 82 (8.6) | 64 (12.9) | 53 (12.0) | 0 | 0 | 0 | 0 |
| 3 or more days | 869 (90.8) | 432 (87.1) | 388 (88.0) | 0 | 0 | 0 | 0 |
| Total days reporting asthma medication* |  |  |  |  |  |  |  |
| SABA | 5531 (10.5) | 1206 (4.3) | 375 (2.3) | 65 (0.1) | 5 (0.01) | 30 (0.2) | 4 (0.004) |
| LABA+ICS | 20,320 (38.6) | 9481 (33.5) | 4654 (28.7) | 54 (0.1) | 7 (0.02) | 20 (0.2) | 1 (0.001) |
| ICS | 5471 (10.4) | 4123 (14.6) | 1730 (10.7) | 25 (0.1) | 5 (0.01) | 7 (0.1) | 1 (0.001) |
| OCS a | 1480 (2.8) | 213 (0.8) | 51 (0.3) | 355 (0.7) | 36 (0.1) | 11 (0.1) | 184 (0.2) |
| LAMA | 1901 (3.6) | 213 (0.8) | 94 (0.6) | 1 (0.002) | 0 | 0 | 0 |
| Biologics | 116 (0.2) | 86 (0.3) | 2 (0.01) | 1 (0.002) | 0 | 0 | 0 |
| VAS asthma |  |  |  |  |  |  |  |
| Maximum value† | 78 (27) | 44 (17) | 12 (17) | 69 (30) | 34 (21) | 12 (19) | 2 (8) |
| Three highest values† | 65 (26) | 30 (14) | 5 (11) | 52 (29) | 18 (12) | 5 (13) | 0 (4) |
| Days with VAS asthma >50* | 7677 (14.6) | 151 (0.5) | 3 (0.02) | 6001 (11.0) | 152 (0.4) | 2 (0.02) | 0 |
| Maximum VAS dyspnea† | 67 (30) | 34 (24) | 16 (16) | 61 (30) | 29 (28) | 15 (16) | 9 (16) |
| CARAT asthma (questions 5-7)e † | 6 (5) | 7 (3) | 8 (2) | 6 (3) | 8 (2) | 9 (1) | 9 (1) |
| Presence of asthma symptoms b,e * | 125 (74.9) | 46 (59.0) | 9 (20.0) | 90 (61.6) | 23 (29.1) | 11 (21.6) | 44 (16.4) |
| CARAT (questions1-10)f † | 15 (8) | 18 (8) | 21 (7) | 15 (8) | 19 (10) | 21 (8) | 20 (8) |
| Uncontrolled c,e * | 159 (95.2) | 73 (93.6) | 34 (75.6) | 138 (94.5) | 70 (88.6) | 34 (66.7) | 229 (85.4) |
| CSMS† | 61 (20) | 39 (20) | 28 (26) | 60 (22) | 46 (23) | 29 (25) | 34 (27) |
| Maximum VAS global† | 78 (26) | 52 (31) | 43 (48) | 78 (28) | 68 (35) | 48 (42) | 58 (44) |
| Maximum VAS eyes† | 66 (41) | 36 (43) | 27 (49) | 72 (37) | 55 (41) | 29 (44) | 37 (51) |
| Maximum VAS nose† | 78 (29) | 56 (39) | 48 (51) | 81 (31) | 72 (38) | 51 (45) | 61 (47) |
| Maximum VAS work† | 52 (43) | 27 (35) | 15 (31) | 53 (43) | 39 (40) | 14 (35) | 23 (45) |
| Maximum VAS sleep† | 79 (32) | 59 (41) | 47 (50) | 77 (34) | 62 (39) | 49 (47) | 54 (45) |
| Total days reporting rhinitis medication* |  |  |  |  |  |  |  |
| Oral antihistamines monotherapy | 5880 (11.2) | 3109 (11.0) | 1134 (7.0) | 6431 (11.8) | 5584 (16.4) | 1021 (7.7) | 12,790 (13.0) |
| Intranasal steroids monotherapy | 3060 (5.8) | 2504 (8.9) | 1535 (9.5) | 2976 (5.5) | 2132 (6.3) | 711 (5.4) | 5562 (5.7) |
| Azelastine-fluticasone monotherapy | 1963 (3.7) | 711 (2.5) | 317 (2.0) | 1476 (2.7) | 1287 (3.8) | 372 (2.8) | 4486 (4.6) |
| Oral antihistamines + intranasal steroids | 7600 (14.4) | 2456 (8.7) | 2237 (13.8) | 3542 (6.5) | 1431 (4.2) | 865 (6.5) | 5671 (5.8) |
| Azelastine-fluticasone + other rhinitis medication | 3773 (7.2) | 957 (3.4) | 809 (5.0) | 1487 (2.7) | 1307 (3.8) | 195 (1.5) | 1912 (1.9) |
| Conjunctivitis* | 717 (74.9) | 367 (74.0) | 293 (66.4) | 1136 (77.4) | 652 (76.0) | 472 (77.1) | 2363 (72.9) |
| Sensitisation f * |  |  |  |  |  |  |  |
| Monosensitisation f | 33 (10.5) | 16 (10.7) | 12 (9.4) | 38 (10.4) | 18 (9.4) | 9 (6.5) | 94 (13.9) |
| Polysensitisation f | 195 (62.3) | 100 (66.7) | 85 (66.4) | 209 (57.4) | 124 (64.6) | 97 (69.8) | 436 (64.7) |

CARAT: Control of Allergic Rhinitis and Asthma Test; CSMS: Combined symptom-medication score; ICS: Inhaled corticosteroid; IQR: Interquartile range; LABA: Long-acting beta-agonist; SABA: Short-acting beta-agonist; VAS: Visual Analogue Scale.

* Results presented as *N*(%); ‖ Results presented as mean (SD); † Results presented as median (IQR)

a It is not possible to differentiate OCS used for asthma or for allergic rhinitis; b Score ≤6; c Score ≤24; d Number of patients for whom sensitisation data are available: 70 for cluster A, 44 for cluster B1, 24 for cluster B2, 88 for cluster C, 46 for cluster D1, 30 for cluster D2, and 151 for cluster D3; e Number of patients reporting CARAT: 167 for cluster A, 78 for cluster B1, 45 for cluster B2, 146 for cluster C, 79 for cluster D1, 51 for cluster D2, and 268 for cluster D3; f Number of patients for whom sensitisation data are available: 313 for cluster A, 150 for cluster B1, 128 for cluster B2, 364 for cluster C, 192 for cluster D1, 139 for cluster D2, and 674 for cluster D3.

**Supplementary Table 3. Characteristics of patients of the cluster C self-reporting and not self-reporting asthma (sample of patients who reported VAS asthma in at least three different months – sample 2)**

|  | **Self-reported asthma (Cluster C’)** | **No self-reported asthma**  **(Cluster C’’)** |
| --- | --- | --- |
| *N* (%) | 391 (50.1) | 389 (49.9) |
| Reported days – *N* (average days per user) | 22,715 (58.1) | 24,637 (63.3) |
| Females* | 255 (65.2) | 205 (52.7) |
| Age‖ | 38.0 (13.6) | 38.6 (14.0) |
| Asthma medication reporting* |  |  |
| 0 days | 319 (81.6) | 379 (97.4) |
| 1 day | 72 (18.4) | 10 (2.6) |
| 2 or more days | 0 (0) | 0 (0) |
| Total days reporting asthma medication* |  |  |
| SABA | 56 (0.2) | 10 (0.04) |
| LABA+ICS | 65 (0.3) | 9 (0.04) |
| ICS | 24 (0.1) | 1 (0.004) |
| OCS a | 76 (0.3) | 168 (0.7) |
| LAMA | 0 | 0 |
| Biologics | 0 | 0 |
| VAS asthma |  |  |
| Maximum value† | 72 (28) | 71 (28) |
| Three highest values† | 58 (31) | 54 (27) |
| Days with VAS asthma >50* | 2460 (10.8) | 2339 (9.5) |
| Maximum VAS dyspnea† | 61 (32) | 61 (34) |
| CARAT asthma (questions 5-7) b † | 6 (3) | 6 (3) |
| Presence of asthma symptoms b,c * | 27 (60.0) | 25 (55.6) |
| CARAT (questions1-10) b † | 14 (5) | 16 (9) |
| Uncontrolled b,d * | 44 (97.8) | 39 (86.7) |
| CSMS† | 58 (23) | 65 (18) |
| Maximum VAS global† | 76 (31) | 86 (25) |
| Maximum VAS eyes† | 71 (36) | 80 (29) |
| Maximum VAS nose† | 82 (35) | 88 (25) |
| Maximum VAS work† | 53 (39) | 63 (31) |
| Maximum VAS sleep† | 77 (36) | 79 (32) |
| Total days reporting rhinitis medication* |  |  |
| Oral antihistamines monotherapy | 1783 (7.8) | 3201 (13.0) |
| Intranasal steroids monotherapy | 828 (3.6) | 1462 (5.9) |
| Azelastine-fluticasone monotherapy | 501 (2.2) | 787 (3.2) |
| Oral antihistamines + intranasal steroids | 1358 (6.0) | 1624 (6.6) |
| Azelastine-fluticasone + other rhinitis medication | 749 (3.3) | 852 (3.5) |
| Conjunctivitis* | 306 (78.3) | 284 (73.0) |
| Sensitisation e * |  |  |
| Monosensitisation e | 20 (8.3) | 16 (7.3) |
| Polysensitisation e | 103 (42.7) | 78 (35.6) |

CARAT: Control of Allergic Rhinitis and Asthma Test; CSMS: Combined symptom-medication score; ICS: Inhaled corticosteroid; IQR: Interquartile range; LABA: Long-acting beta-agonist; SABA: Short-acting beta-agonist; VAS: Visual Analogue Scale. * Results presented as *N*(%); ‖ Results presented as mean (SD); † Results presented as median (IQR)

a It is not possible to differentiate OCS used for asthma or for allergic rhinitis; b Information obtained for those patients from whom CARAT information is available (*N*=90); c Score ≤6; d Score ≤24; e Number of patients for whom sensitisation data are available: 241 for cluster C’ and 219 for cluster C’’.

**Supplementary Table 4. Asthma-related clusters using k-means clustering in patients who self-report asthma and who do not self-report asthma (alternate clustering approach) in samples 1 and 3**

| **A. Sample 1: Patients reporting VAS asthma in at least 3 different months who have answered at least once to CARAT** | | | | | | |
| --- | --- | --- | --- | --- | --- | --- |
|  | **Self-reported asthma** | | | | **No self-reported asthma** | |
|  | **Cluster I** | **Cluster II** | **Cluster III** | **Cluster IV** | **Cluster V** | **Cluster VI** |
| *N* (%) | 72 (15.5) | 64 (13.7) | 40 (8.6) | 40 (8.6) | 60 (12.9) | 190 (40.8) |
| Reported days – *N* (average days per user) | 8571 (119.0) | 8168 (127.6) | 2729 (68.2) | 2568 (64.2) | 6793 (113.2) | 18,501 (97.4) |
| Females* | 61 (84.7) | 43 (67.2) | 26 (65.0) | 30 (75.0) | 34 (56.7) | 119 (62.6) |
| Age‖ | 40.5 (10.8) | 40.4 (11.4) | 39.1 (13.3) | 36.6 (13.8) | 41.0 (14.1) | 37.5 (13.7) |
| Asthma medication reporting* |  |  |  |  |  |  |
| 0 days | 0 | 0 | 33 (82.5) | 36 (90.0) | 49 (81.7) | 187 (98.4) |
| 1 day | 0 | 0 | 7 (17.5) | 4 (10.0) | 4 (6.7) | 2 (1.1) |
| 2 days | 7 (9.7) | 8 (9.4) | 0 | 0 | 2 (3.3) | 1 (0.5) |
| 3 or more days | 65 (90.3) | 58 (90.6) | 0 | 0 | 5 (8.3) | 0 |
| Total days reporting asthma medication* |  |  |  |  |  |  |
| SABA | 1316 (15.4) | 549 (6.7) | 7 (0.3) | 7 (0.3) | 94 (1.4) | 0 |
| LABA+ICS | 3916 (45.7) | 3307 (40.5) | 4 (0.1) | 1 (0.04) | 65 (1.0) | 2 (0.01) |
| ICS | 1149 (13.4) | 1441 (17.6) | 2 (0.1) | 0 | 20 (0.3) | 2 (0.01) |
| OCS a | 507 (5.9) | 41 (0.5) | 7 (0.3) | 1 (0.04) | 55 (0.8) | 29 (0.2) |
| LAMA | 651 (7.6) | 456 (5.6) | 0 | 0 | 0 | 0 |
| Biologics | 7 (0.1) | 6 (0.1) | 0 | 0 | 0 | 0 |
| VAS asthma |  |  |  |  |  |  |
| Maximum value† | 85 (18) | 45 (26) | 81 (24) | 26 (29) | 66 (26) | 9 (17) |
| Three highest values† | 74 (18) | 35 (23) | 65 (26) | 16 (18) | 55 (27) | 5 (10) |
| Days with VAS asthma >50* | 1347 (15.7) | 33 (0.4) | 500 (18.3) | 7 (0.2) | 607 (8.9) | 7 (0.04) |
| Maximum VAS dyspnea† | 71 (28) | 24 (36) | 62 (28) | 18 (30) | 47 (58) | 20 (26) |
| CARAT asthma (questions 5-7)† | 5 (5) | 7 (3) | 6 (2) | 8 (2) | 7 (3) | 9 (2) |
| Presence of asthma symptoms b * | 49 (68.1) | 22 (34.4) | 26 (65.0) | 10 (25.0) | 28 (46.7) | 25 (13.2) |
| CARAT (questions1-10)† | 13 (8) | 19 (6) | 14 (5) | 20 (8) | 18 (9) | 20 (7) |
| Uncontrolled c * | 70 (97.2) | 50 (78.1) | 39 (97.5) | 30 (75.0) | 48 (80.0) | 144 (75.8) |
| CSMS† | 68 (19) | 37 (17) | 65 (18) | 34 (31) | 60 (21) | 40 (28) |
| Maximum VAS global† | 84 (22) | 49 (29) | 87 (31) | 52 (50) | 81 (32) | 68 (38) |
| Maximum VAS eyes† | 78 (32) | 43 (40) | 77 (30) | 38 (33) | 75 (31) | 50 (50) |
| Maximum VAS nose† | 87 (29) | 59 (33) | 88 (22) | 62 (48) | 84 (31) | 71 (45) |
| Maximum VAS work† | 61 (28) | 27 (37) | 60 (46) | 34 (38) | 63 (51) | 31 (44) |
| Maximum VAS sleep† | 88 (27) | 69 (40) | 91 (27) | 48 (59) | 84 (33) | 67 (42) |
| Total days reporting rhinitis medication* |  |  |  |  |  |  |
| Oral antihistamines monotherapy | 1199 (14.0) | 899 (11.0) | 195 (7.1) | 147 (5.7) | 596 (8.8) | 2247 (12.1) |
| Intranasal steroids monotherapy | 342 (4.0) | 667 (8.2) | 100 (3.7) | 36 (1.4) | 459 (6.8) | 679 (3.7) |
| Azelastine-fluticasone monotherapy | 257 (3.0) | 533 (6.5) | 54 (2.0) | 2 (0.1) | 160 (2.4) | 999 (5.4) |
| Oral antihistamines + intranasal steroids | 2011 (23.5) | 1553 (19.0) | 174 (6.4) | 178 (6.9) | 490 (7.2) | 865 (4.7) |
| Azelastine-fluticasone + other medication | 865 (10.1) | 834 (10.2) | 113 (4.1) | 15 (0.6) | 63 (0.9) | 483 (2.6) |
| Conjunctivitis* | 65 (90.3) | 44 (68.8) | 31 (77.5) | 33 (82.5) | 45 (75.0) | 148 (77.9) |
| Sensitisation d * |  |  |  |  |  |  |
| Monosensitisation d | 8 (11.9) | 5 (7.9) | 4 (10.3) | 3 (7.7) | 6 (10.2) | 27 (14.5) |
| Polysensitisation d | 49 (73.1) | 38 (60.3) | 24 (61.5) | 24 (61.5) | 32 (54.2) | 107 (57.5) |
| **B. Sample 3: Patients reporting at least 3 VAS asthma** | | | | | | |
|  | **Self-reported asthma** | | | | **No self-reported asthma** | |
|  | **Cluster I** | **Cluster II** | **Cluster III** | **Cluster IV** | **Cluster V** | **Cluster VI** |
| *N* (%) | 845 (10.5) | 778 (9.6) | 564 (7.0) | 885 (11.0) | 943 (11.7) | 4060 (50.3) |
| Reported days – *N* (average days per user) | 46,768 (55.3) | 36,422 (46.8) | 19,241 (34.1) | 19,575 (22.1) | 41,524 (44.0) | 133,639 (32.9) |
| Females* | 614 (72.7) | 458 (58.9) | 372 (66.0) | 501 (56.6) | 556 (59.0) | 2197 (54.1) |
| Age‖ | 39.6 (13.7) | 39.1 (13.8) | 36.7 (13.5) | 35.1 (13.1) | 37.6 (13.6) | 34.6 (12.9) |
| Asthma medication reporting* |  |  |  |  |  |  |
| 0 days | 0 | 0 | 450 (79.8) | 778 (87.9) | 804 (85.3) | 3888 (95.8) |
| 1 day | 0 | 0 | 114 (20.2) | 107 (12.1) | 17 (1.8) | 29 (0.7) |
| 2 days | 71 (8.4) | 96 (12.3) | 0 | 0 | 15 (1.6) | 17 (0.4) |
| 3 or more days | 774 (91.6) | 682 (87.7) | 0 | 0 | 107 (11.3) | 126 (3.1) |
| Total days reporting asthma medication* |  |  |  |  |  |  |
| SABA | 5198 (11.1) | 1570 (4.3) | 51 (0.3) | 46 (0.2) | 327 (0.8) | 24 (0.02) |
| LABA+ICS | 19,225 (41.1) | 14,564 (40.0) | 40 (0.2) | 40 (0.2) | 582 (1.4) | 86 (0.1) |
| ICS | 5214 (11.1) | 5591 (15.4) | 20 (0.1) | 11 (0.1) | 263 (0.6) | 263 (0.2) |
| OCS a | 1462 (3.1) | 231 (0.6) | 86 (0.4) | 32 (0.2) | 280 (0.7) | 239 (0.2) |
| LAMA | 1899 (4.1) | 305 (0.8) | 1 (0.01) | 0 | 2 (0.01) | 2 (0.001) |
| Biologics | 116 (0.2) | 88 (0.2) | 1 (0.01) | 0 | 0 | 0 |
| VAS asthma |  |  |  |  |  |  |
| Maximum value† | 78 (25) | 34 (28) | 74 (26) | 22 (31) | 68 (31) | 4 (14) |
| Three highest values† | 66 (25) | 21 (24) | 58 (25) | 10 (20) | 51 (31) | 1 (7) |
| Days with VAS asthma >50* | 7106 (15.2) | 146 (0.4) | 2732 (14.2) | 90 (0.5) | 3809 (9.2) | 103 (0.1) |
| Maximum VAS dyspnea† | 68 (29) | 29 (23) | 62 (30) | 24 (30) | 59 (32) | 15 (25) |
| CARAT asthma (questions 5-7)e † | 5 (4) | 7 (3) | 5 (4) | 8 (3) | 7 (3) | 9 (1) |
| Presence of asthma symptoms b,e * | 113 (77.4) | 47 (48.5) | 36 (73.5) | 26 (30.6) | 67 (58.8) | 59 (17.2) |
| CARAT (questions1-10)e † | 14 (9) | 18 (8) | 14 (5) | 19 (11) | 17 (9) | 20 (8) |
| Uncontrolled c,e * | 140 (95.9) | 85 (87.6) | 48 (98.0) | 63 (74.1) | 106 (93.0) | 295 (86.0) |
| CSMS† | 61 (20) | 33 (24) | 60 (22) | 35 (26) | 62 (21) | 36 (27) |
| Maximum VAS global† | 78 (26) | 47 (34) | 77 (29) | 51 (41) | 80 (28) | 60 (43) |
| Maximum VAS eyes† | 66 (40) | 30 (42) | 70 (37) | 36 (49) | 74 (36) | 42 (52) |
| Maximum VAS nose† | 79 (28) | 49 (41) | 80 (33) | 55 (44) | 83 (29) | 63 (46) |
| Maximum VAS work† | 52 (46) | 20 (35) | 49 (61) | 21 (41) | 55 (38) | 26 (44) |
| Maximum VAS sleep† | 79 (31) | 51 (45) | 78 (35) | 52 (46) | 77 (34) | 56 (43) |
| Total days reporting rhinitis medication* |  |  |  |  |  |  |
| Oral antihistamines monotherapy | 5418 (11.6) | 3726 (10.2) | 1637 (8.5) | 1749 (8.9) | 5255 (12.7) | 18,164 (13.6) |
| Intranasal steroids monotherapy | 2267 (4.8) | 3846 (10.6) | 617 (3.2) | 1082 (5.5) | 2926 (7.0) | 7742 (5.8) |
| Azelastine-fluticasone monotherapy | 1671 (3.6) | 1031 (2.8) | 491 (2.6) | 466 (2.4) | 1213 (2.9) | 5740 (4.3) |
| Oral antihistamines + intranasal steroids | 7018 (15.0) | 3693 (10.1) | 1025 (5.3) | 1117 (5.7) | 3082 (7.4) | 7867 (5.9) |
| Azelastine-fluticasone + other medication | 3609 (7.7) | 1433 (3.9) | 470 (2.4) | 307 (1.6) | 1118 (2.7) | 3503 (2.6) |
| Conjunctivitis* | 642 (76.0) | 560 (72.0) | 451 (80.0) | 669 (75.6) | 709 (75.2) | 2969 (73.1) |
| Sensitisation f * |  |  |  |  |  |  |
| Monosensitisation f | 27 (9.9) | 23 (10.3) | 11 (7.8) | 14 (6.9) | 29 (12.1) | 116 (13.2) |
| Polysensitisation f | 172 (62.8) | 148 (66.1) | 81 (57.4) | 139 (68.8) | 138 (57.5) | 568 (64.6) |

CARAT: Control of Allergic Rhinitis and Asthma Test; CSMS: Combined symptom-medication score; ICS: Inhaled corticosteroid; IQR: Interquartile range; LABA: Long-acting beta-agonist; SABA: Short-acting beta-agonist; VAS: Visual Analogue Scale.

* Results presented as *N*(%); ‖ Results presented as mean (SD); † Results presented as median (IQR)

a It is not possible to differentiate OCS used for asthma or for allergic rhinitis; b Score ≤6; c Score ≤24; d Number of patients for whom sensitisation data are available: 67 for cluster I, 63 for cluster II, 39 for cluster III, 39 for cluster IV, 59 for cluster V, and 186 for cluster VI; e Number of days reporting CARAT: 146 for cluster I, 97 for cluster II, 49 for cluster III, 85 for cluster IV, 114 for cluster V, and 343 for cluster VI; f Number of patients for whom sensitisation data are available: 274 for cluster I, 224 for cluster II, 141 for cluster III, 202 for cluster IV, 240 for cluster V, and 879 for cluster VI.

**Supplementary Table 5. Asthma-related clusters in patients depending on self-reporting asthma (Sample 2)**

|  | Self-reported asthma | | | | No self-reported asthma | |
| --- | --- | --- | --- | --- | --- | --- |
|  | Cluster I | Cluster II | Cluster III | Cluster IV | Cluster V | Cluster VI |
| *N* (%) | 429 (11.3) | 378 (10.0) | 318 (8.4) | 428 (11.3) | 455 (12.0) | 1789 (47.1) |
| Reported days – *N* | 36,483 | 33,239 | 18,299 | 21,570 | 31,628 | 115,620 |
| Average days per user – *N* | 85.0 | 87.9 | 57.5 | 50.4 | 69.7 | 64.6 |
| Females* | 300 (69.9) | 216 (57.1) | 209 (65.7) | 237 (55.4) | 237 (52.2) | 943 (52.7) |
| Age‖ | 40.9 (14.3) | 40.4 (14.1) | 38.2 (13.7) | 36.5 (13.7) | 38.9 (13.9) | 35.3 (13.2) |
| Asthma medication reporting* |  |  |  |  |  |  |
| 0 days | 0 | 0 | 257 (80.8) | 362 (84.6) | 418 (92.1) | 1763 (98.5) |
| 1 day | 0 | 0 | 61 (19.2) | 66 (15.4) | 10 (2.2) | 9 (0.5) |
| 2 days | 65 (15.2) | 57 (15.1) | 0 | 0 | 6 (1.3) | 4 (0.2) |
| 3 or more days | 364 (84.8) | 321 (84.9) | 0 | 0 | 21 (4.6) | 13 (0.7) |
| Total days reporting asthma medication a * |  |  |  |  |  |  |
| SABA | 4152 (11.4) | 1535 (4.6) | 57 (0.3) | 47 (0.2) | 166 (0.5) | 17 (0.01) |
| LABA+ICS | 16,156 (44.3) | 14,815 (44.6) | 57 (0.3) | 36 (0.2) | 197 (0.6) | 149 (0.1) |
| ICS | 4492 (12.3) | 5529 (16.6) | 16 (0.1) | 24 (0.1) | 180 (0.6) | 186 (0.2) |
| OCS a | 1314 (3.6) | 242 (0.7) | 73 (0.4) | 29 (0.1) | 169 (0.5) | 132 (0.1) |
| LAMA | 1453 (4.0) | 534 (1.6) | 0 | 0 | 0 | 0 |
| Biologics | 112 (0.3) | 86 (0.3) | 0 | 0 | 0 | 0 |
| VAS asthma |  |  |  |  |  |  |
| Maximum value† | 80 (22) | 38 (24) | 77 (25) | 27 (31) | 70 (31) | 6 (17) |
| Three highest values† | 69 (23) | 27 (23) | 63 (25) | 16 (22) | 52 (30) | 3 (9) |
| Days with VAS asthma >50* | 5354 (14.7) | 84 (0.3) | 2463 (13.5) | 58 (0.3) | 2579 (8.2) | 56 (0.1) |
| Maximum VAS dyspnea† | 69 (28) | 30 (24) | 65 (29) | 25 (26) | 60 (36) | 16 (25) |
| CARAT asthma (questions 5-7) b † | 5 (5) | 7 (3) | 6 (2) | 8 (2) | 7 (3) | 9 (2) |
| Presence of asthma symptoms b,c * | 49 (68.1) | 22 (34.4) | 26 (65.0) | 10 (25.0) | 28 (46.7) | 25 (13.2) |
| CARAT (questions1-10) b † | 13 (8) | 19 (6) | 14 (5) | 20 (8) | 18 (9) | 20 (7) |
| Uncontrolled b,d * | 70 (97.2) | 50 (78.1) | 39 (97.5) | 30 (75.0) | 48 (80.0) | 144 (75.8) |
| CSMS† | 63 (19) | 35 (21) | 61 (24) | 35 (27) | 64 (19) | 38 (27) |
| Maximum VAS global† | 79 (23) | 48 (32) | 79 (28) | 52 (40) | 83 (25) | 63 (40) |
| Maximum VAS eyes† | 69 (38) | 34 (40) | 73 (35) | 39 (46) | 79 (30) | 45 (50) |
| Maximum VAS nose† | 81 (28) | 52 (40) | 84 (31) | 58 (41) | 87 (27) | 68 (44) |
| Maximum VAS work† | 57 (32) | 25 (33) | 56 (37) | 25 (40) | 61 (32) | 30 (43) |
| Maximum VAS sleep† | 81 (28) | 52 (42) | 80 (35) | 55 (51) | 78 (33) | 58 (44) |
| Total days reporting rhinitis medication* |  |  |  |  |  |  |
| Oral antihistamines monotherapy | 4406 (12.1) | 3510 (10.6) | 1350 (7.4) | 4406 (20.4) | 3835 (12.1) | 15,656 (13.5) |
| Intranasal steroids monotherapy | 1747 (4.8) | 3710 (11.2) | 669 (3.7) | 1747 (8.1) | 2085 (6.6) | 6110 (5.3) |
| Azelastine-fluticasone monotherapy | 1268 (3.5) | 1203 (3.6) | 423 (2.3) | 1268 (5.9) | 1013 (3.2) | 4859 (4.2) |
| Oral antihistamines + intranasal steroids | 5768 (15.8) | 3104 (9.3) | 1260 (6.9) | 1335 (6.2) | 2390 (7.6) | 6594 (5.7) |
| Azelastine-fluticasone + other medication | 2550 (7.0) | 1758 (5.3) | 606 (3.3) | 2550 (11.8) | 918 (2.9) | 2890 (2.5) |
| Conjunctivitis* | 325 (75.8) | 268 (70.9) | 247 (77.7) | 314 (73.4) | 331 (72.9) | 1320 (73.8) |
| Sensitisation e * |  |  |  |  |  |  |
| Monosensitisation e | 12 (4.6) | 18 (7.3) | 18 (9.2) | 17 (6.2) | 19 (7.3) | 87 (8.2) |
| Polysensitisation e | 103 (39.6) | 103 (42.0) | 81 (41.5) | 132 (47.8) | 94 (35.9) | 403 (38.2) |

CARAT: Control of Allergic Rhinitis and Asthma Test; CSMS: Combined symptom-medication score; ICS: Inhaled corticosteroid; IQR: Interquartile range; LABA: Long-acting beta-agonist; SABA: Short-acting beta-agonist; VAS: Visual Analogue Scale.

* Results presented as *N*(%); ‖ Results presented as mean (SD); † Results presented as median (IQR)

a It is not possible to differentiate OCS used for asthma or for allergic rhinitis; b Number of patients reporting CARAT: 72 for cluster I, 64 for cluster II, 40 for cluster III, 40 for cluster IV, 60 for cluster V, and 190 for cluster VI; c Score ≤6; d Score ≤24; e Number of patients for whom sensitisation data are available: 260 for cluster I, 245 for cluster II, 195 for cluster III, 276 for cluster IV, 262 for cluster V, and 1056 for cluster VI.

**Supplementary Table 6. Results of sensitivity analyses of two-step k-means approaches considering all patients reporting VAS asthma in at least 4 different months (A) and 5 different months (B).**

| **A. Patients reporting VAS asthma in at least 4 different months** | | | | | | | |
| --- | --- | --- | --- | --- | --- | --- | --- |
|  | **Cluster A**  **(“Treated uncontrolled asthma”)** | **Cluster B1**  **(“Treated partly controlled asthma”)** | **Cluster B2**  **(“Treated controlled asthma”)** | **Cluster C**  **(“Untreated uncontrolled asthma”)** | **Cluster D1**  **(“Untreated partly controlled asthma”)** | **Cluster D2**  **(“Untreated controlled asthma”)** | **Cluster D3**  **(“No evidence of asthma”)** |
| *N* (%) | 345 (13.2) | 176 (6.8) | 133 (5.1) | 544 (20.9) | 298 (11.4) | 185 (7.1) | 925 (35.5) |
| Reported days – *N* (average days per user) | 35,514 (102.9) | 22,371 (127.1) | 11,912 (89.6) | 42,692 (78.5) | 28,925 (97.1) | 12,940 (69.9) | 78,860 (85.3) |
| Females* | 236 (68.4) | 100 (56.8) | 75 (56.4) | 320 (58.8) | 159 (53.4) | 93 (50.3) | 469 (50.7) |
| Age‖ | 41.4 (13.9) | 40.5 (14.0) | 40.3 (14.2) | 39.2 (14.2) | 36.7 (12.8) | 37.4 (14.8) | 34.6 (13.3) |
| Self-reported asthma* | 329 (95.4) | 170 (96.6) | 125 (94.0) | 271 (49.8) | 36 (12.1) | 185 (100) | 0 |
| Asthma medication reporting* |  |  |  |  |  |  |  |
| 0 days | 0 | 0 | 0 | 492 (90.4) | 294 (98.7) | 158 (85.4) | 923 (99.8) |
| 1 day | 2 (0.6) | 5 (2.8) | 0 | 52 (9.6) | 4 (1.3) | 27 (1.3) | 2 (0.2) |
| 2 days | 33 (9.6) | 19 (10.8) | 19 (14.3) | 0 | 0 | 0 | 0 |
| 3 days or more | 310 (89.9) | 152 (86.4) | 114 (85.7) | 0 | 0 | 0 | 0 |
| Total days reporting asthma medication* |  |  |  |  |  |  |  |
| SABA | 3792 (10.7) | 954 (4.3) | 529 (4.4) | 33 (0.1) | 1 (0.003) | 20 (0.2) | 2 (0.003) |
| LABA/LABA+ICS | 15,445 (43.5) | 8790 (39.3) | 5553 (46.6) | 58 (0.1) | 1 (0.003) | 16 (0.1) | 0 |
| ICS | 4236 (11.9) | 2487 (11.1) | 3030 (25.4) | 21 (0.1) | 4 (0.01) | 14 (0.1) | 2 (0.003) |
| Other | 1619 (4.6) | 459 (2.1) | 18 (0.2) | 0 | 0 | 0 | 0 |
| VAS asthma |  |  |  |  |  |  |  |
| Maximum value† | 82 (23) | 49 (12) | 23 (17) | 72 (27) | 36 (21) | 16 (19) | 5 (9) |
| Three highest values† | 71 (23) | 38 (13) | 15 (16) | 57 (26) | 22 (12) | 10 (15) | 2 (6) |
| Days with VAS asthma >50* | 4993 (14.1) | 84 (0.4) | 0 | 3984 (9.3) | 61 (0.2) | 1 (0.01) | 0 |
| Maximum VAS dyspnea† | 69 (29) | 39 (26) | 17 (14) | 61 (33) | 31 (20) | 19 (14) | 9 (14) |
| CARAT asthma (questions 5-7) a † | 6 (4) | 8 (2) | 7 (3) | 6 (3) | 9 (2) | 9 (1) | 9 (1) |
| Presence of asthma symptoms a,b * | 55 (79.7) | 13 (38.2) | 7 (41.2) | 46 (63.0) | 13 (29.5) | 3 (15.8) | 13 (12.6) |
| CARAT (questions1-10) a † | 16 (8) | 22 (10) | 20 (6) | 16 (9) | 20 (10) | 21 (8) | 21 (9) |
| Uncontrolled a,c * | 66 (95.7) | 28 (82.4) | 15 (88.2) | 67 (91.8) | 36 (81.8) | 13 (68.4) | 77 (74.8) |
| CSMS† | 64 (20) | 42 (22) | 27 (17) | 62 (22) | 46 (25) | 27 (22) | 36 (27) |
| Maximum VAS global† | 81 (25) | 53 (32) | 37 (30) | 81 (28) | 70 (35) | 44 (36) | 62 (42) |
| Maximum VAS eyes† | 73 (39) | 47 (40) | 29 (37) | 77 (32) | 58 (41) | 31 (37) | 45 (51) |
| Maximum VAS nose† | 83 (28) | 58 (36) | 45 (33) | 85 (29) | 75 (36) | 49 (42) | 67 (44) |
| Maximum VAS work† | 58 (33) | 34 (32) | 16 (26) | 61 (35) | 43 (35) | 20 (29) | 30 (42) |
| Maximum VAS sleep† | 81 (29) | 66 (42) | 41 (45) | 79 (33) | 66 (37) | 48 (54) | 57 (45) |
| Total days reporting rhinitis medication* |  |  |  |  |  |  |  |
| Oral antihistamines monotherapy | 4179 (11.8) | 2771 (12.4) | 843 (7.1) | 4529 (10.6) | 4369 (15.1) | 950 (7.3) | 9684 (12.3) |
| Intranasal steroids monotherapy | 1597 (4.5) | 2234 (10.0) | 1542 (12.9) | 1976 (4.6) | 1810 (6.3) | 562 (4.3) | 3978 (5.0) |
| Azelastine-fluticasone monotherapy | 1244 (3.5) | 991 (4.4) | 249 (2.1) | 1151 (2.7) | 944 (3.3) | 279 (2.2) | 3291 (4.2) |
| Oral antihistamines + intranasal steroids | 5524 (15.6) | 1876 (8.4) | 991 (8.3) | 2611 (6.1) | 1537 (5.3) | 1028 (7.9) | 4689 (5.9) |
| Azelastine-fluticasone + other rhinitis medication | 2347 (6.6) | 1477 (6.6) | 356 (3.0) | 1468 (3.4) | 1137 (3.9) | 230 (1.8) | 1423 (1.8) |
| Conjunctivitis* | 258 (74.8) | 137 (77.8) | 93 (69.9) | 425 (78.1) | 225 (75.5) | 131 (70.8) | 692 (74.8) |
| **B. Patients reporting VAS asthma in at least 5 different months** | | | | | | | |
|  | **Cluster A**  **(“Treated uncontrolled asthma”)** | **Cluster B1**  **(“Treated partly controlled asthma”)** | **Cluster B2**  **(“Treated controlled asthma”)** | **Cluster C**  **(“Untreated uncontrolled asthma”)** | **Cluster D1**  **(“Untreated partly controlled asthma”)** | **Cluster D2**  **(“Untreated controlled asthma”)** | **Cluster D3**  **(“No evidence of asthma”)** |
| *N* (%) | 279 (14.4) | 144 (7.5) | 97 (5.0) | 394 (20.4) | 238 (12.3) | 129 (6.7) | 650 (33.7) |
| Reported days – *N* (average days per user) | 32,682 (117.1) | 21,398 (148.6) | 11,607 (119.7) | 36,298 (92.1) | 29,828 (125.3) | 10,377 (80.4) | 69,934 (107.6) |
| Females* | 189 (67.7) | 80 (55.6) | 51 (52.6) | 233 (59.1) | 131 (55.0) | 63 (48.8) | 328 (50.5) |
| Age‖ | 41.8 (13.6) | 40.4 (13.7) | 40.4 (14.1) | 39.9 (14.2) | 38.0 (13.2) | 38.0 (15.0) | 34.3 (13.3) |
| Self-reported asthma* | 265 (95.0) | 138 (95.8) | 91 (93.8) | 191 (48.5) | 42 (17.6) | 129 (100) | 0 |
| Asthma medication reporting* |  |  |  |  |  |  |  |
| 0 days | 0 | 0 | 0 | 358 (90.9) | 233 (97.9) | 110 (85.3) | 649 (99.8) |
| 1 day | 0 | 1 (0.7) | 0 | 36 (9.1) | 5 (2.1) | 19 (14.7) | 1 (0.2) |
| 2 days | 22 (7.9) | 15 (10.4) | 7 (7.2) | 0 | 0 | 0 | 0 |
| 3 days or more | 257 (92.1) | 128 (88.9) | 90 (92.8) | 0 | 0 | 0 | 0 |
| Total days reporting asthma medication* |  |  |  |  |  |  |  |
| SABA | 3247 (9.9) | 1036 (4.8) | 425 (3.7) | 23 (0.1) | 4 (0.01) | 12 (0.1) | 2 (0.003) |
| LABA/LABA+ICS | 14,122 (43.2) | 8713 (40.7) | 5136 (44.2) | 30 (0.1) | 3 (0.01) | 12 (0.1) | 0 |
| ICS | 3923 (12.0) | 2376 (11.1) | 2702 (23.3) | 17 (0.1) | 3 (0.01) | 5 (0.1) | 0 |
| Other | 1417 (4.3) | 459 (2.1) | 0 | 0 | 0 | 0 | 0 |
| VAS asthma |  |  |  |  |  |  |  |
| Maximum value† | 81 (22) | 49 (13) | 23 (16) | 75 (29) | 38 (19) | 14 (19) | 5 (10) |
| Three highest values† | 72 (23) | 38 (12) | 15 (14) | 61 (28) | 24 (11) | 7 (15) | 2 (6) |
| Days with VAS asthma >50* | 4431 (13.6) | 75 (0.4) | 0 | 3516 (9.7) | 48 (0.2) | 1 (0.01) | 0 |
| Maximum VAS dyspnea† | 68 (28) | 40 (25) | 17 (14) | 62 (30) | 30 (21) | 20 (16) | 8 (12) |
| CARAT asthma (questions 5-7) d † | 6 (4) | 8 (2) | 8 (2) | 6 (3) | 9 (2) | 9 (1) | 9 (0) |
| Presence of asthma symptoms d,b * | 47 (83.9) | 12 (38.7) | 3 (27.3) | 35 (63.6) | 10 (30.3) | 1 (6.3) | 8 (10.3) |
| CARAT (questions1-10) d † | 16 (8) | 22 (9) | 21 (8) | 17 (9) | 20 (9) | 23 (8) | 22 (7) |
| Uncontrolled d,c * | 54 (96.4) | 25 (80.6) | 9 (81.8) | 49 (89.1) | 28 (84.8) | 10 (62.5) | 55 (70.5) |
| CSMS† | 63 (20) | 42 (21) | 27 (16) | 63 (21) | 46 (24) | 28 (25) | 36 (26) |
| Maximum VAS global† | 81 (25) | 54 (31) | 37 (34) | 83 (26) | 69 (34) | 45 (38) | 62 (42) |
| Maximum VAS eyes† | 73 (39) | 46 (39) | 30 (38) | 77 (33) | 59 (44) | 35 (43) | 45 (50) |
| Maximum VAS nose† | 83 (29) | 62 (35) | 45 (34) | 87 (27) | 76 (40) | 51 (47) | 67 (43) |
| Maximum VAS work† | 60 (34) | 34 (29) | 17 (26) | 63 (36) | 45 (40) | 22 (30) | 30 (41) |
| Maximum VAS sleep† | 81 (30) | 70 (39) | 41 (41) | 79 (33) | 67 (35) | 52 (56) | 56 (45) |
| Total days reporting rhinitis medication* |  |  |  |  |  |  |  |
| Oral antihistamines monotherapy | 3816 (11.7) | 2591 (12.1) | 876 (7.5) | 3946 (10.9) | 3934 (13.2) | 841 (8.1) | 8455 (12.1) |
| Intranasal steroids monotherapy | 1335 (4.1) | 2245 (10.5) | 1487 (12.8) | 1707 (4.7) | 1770 (5.9) | 454 (4.4) | 3234 (4.6) |
| Azelastine-fluticasone monotherapy | 1081 (3.3) | 935 (4.4) | 154 (1.3) | 946 (2.6) | 943 (3.2) | 222 (2.1) | 2975 (4.3) |
| Oral antihistamines + intranasal steroids | 5110 (15.6) | 2006 (9.4) | 897 (7.7) | 2437 (6.7) | 1264 (4.2) | 912 (8.8) | 4094 (5.9) |
| Azelastine-fluticasone + other rhinitis medication | 2245 (6.9) | 1447 (6.8) | 319 (2.7) | 1267 (3.5) | 1079 (3.6) | 164 (1.6) | 1167 (1.7) |
| Conjunctivitis* | 210 (75.3) | 106 (73.6) | 68 (70.1) | 316 (80.2) | 178 (74.8) | 96 (74.4) | 492 (75.7) |

CARAT: Control of Allergic Rhinitis and Asthma Test; CSMS: Combined symptom-medication score; ICS: Inhaled corticosteroid; IQR: Interquartile range; LABA: Long-acting beta-agonist; SABA: Short-acting beta-agonist; VAS: Visual Analogue Scale

* Results presented as *N*(%); ‖ Results presented as mean (SD); † Results presented as median (IQR)

a Number of patients reporting CARAT: 69 for cluster A, 34 for cluster B1, 17 for cluster B2, 73 for cluster C, 44 for cluster D1, 19 for cluster D2, and 103 for cluster D3; b Score ≤6; c Score ≤24; d Number of patients reporting CARAT: 56 for cluster A, 31 for cluster B1, 11 for cluster B2, 55 for cluster C, 33 for cluster D1, 16 for cluster D2, and 78 for cluster D3.

**Supplementary Table 7. Comparison of the classification obtained with the main clustering approach with physician-assessed asthma status in participants of the Twinning project.**

| **Asthma** | | | | **Cluster** | **Physician’s assessed asthma status** | | |
| --- | --- | --- | --- | --- | --- | --- | --- |
| **Interpretation** | **Treatment** | **Control** | **Majority of self-report** | **Current asthma – *N* (%)** | **Past asthma – *N* (%)** | **No asthma – *N* (%)** |
| Probable asthma | Treated | Uncontrolled | Yes | A | 29 (78.4) | 6 (16.2) | 2 (5.4) |
| Partly-controlled | B | 27 (71.1) | 9 (23.7) | 2 (5.3) |
| Controlled |
| Untreated | Uncontrolled | Yes | C’ | 9 (56.3) | 4 (25.0) | 3 (18.7) |
| Possible asthma | No | C’’ | 1 (6.7) | 1 (6.7) | 13 (86.7) |
| Partly-controlled | D1 | 3 (13.6) | 6 (27.3) | 13 (59.1) |
| Controlled | Yes | D2 | 2 (16.7) | 7 (58.3) | 3 (25.0) |
| No current asthma | No | D3 | 5 (9.6) | 7 (13.5) | 40 (76.9) |

**Supplementary Figure 1. Representation of the approaches followed in our study, including assessed samples and performed analyses**

**
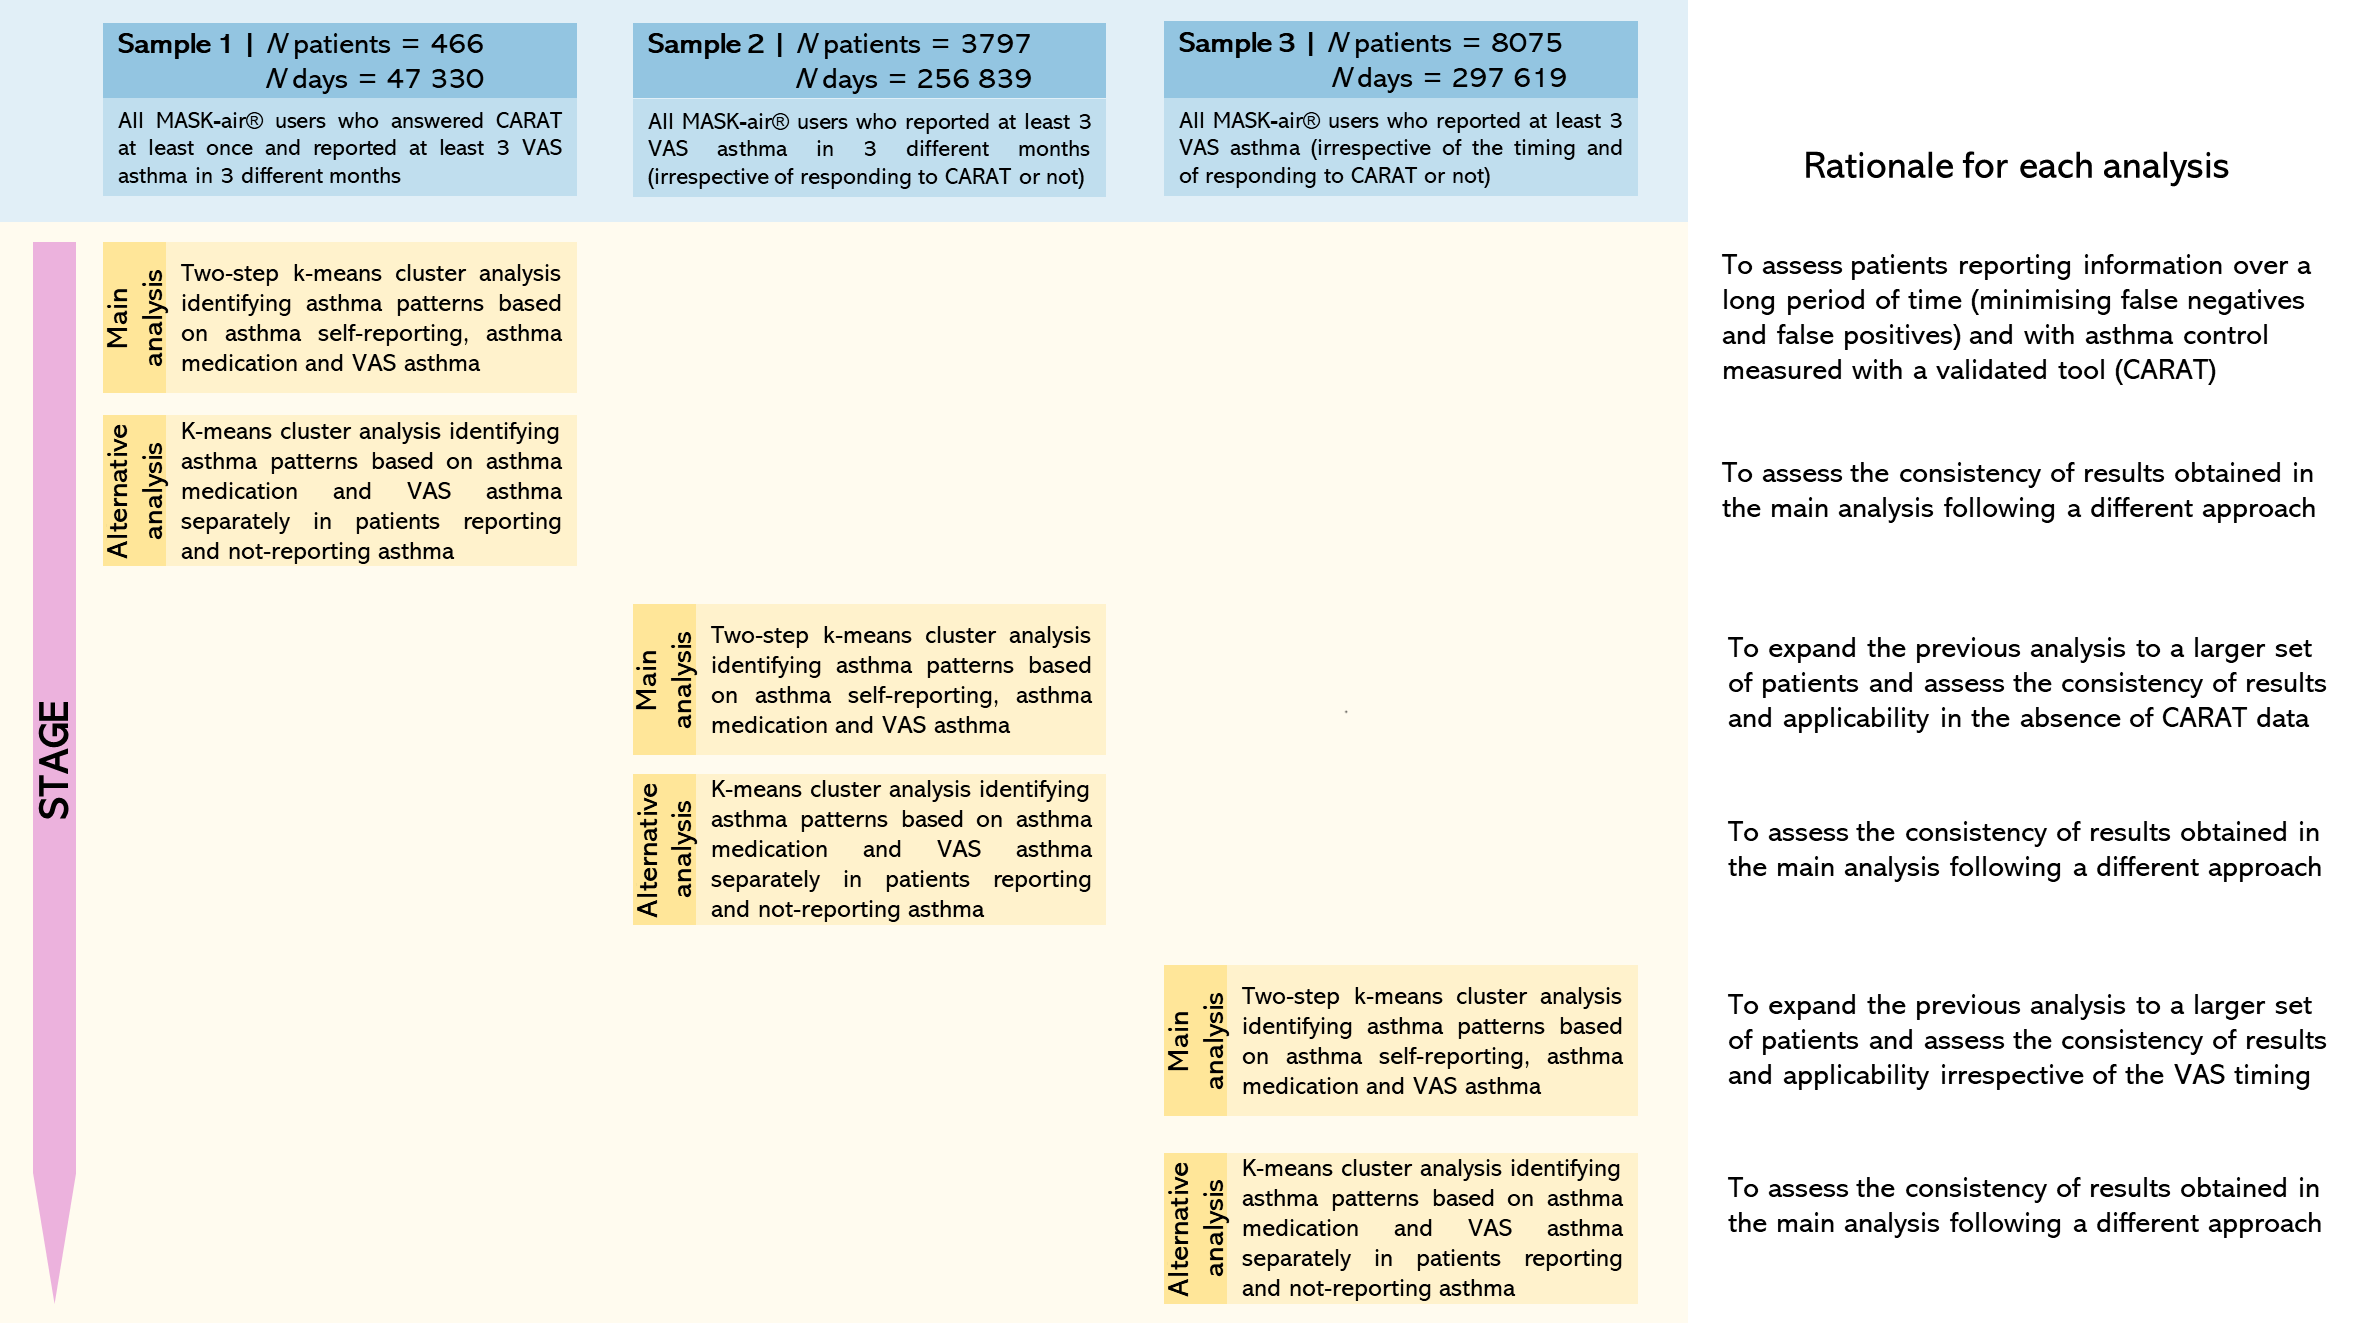
**

**
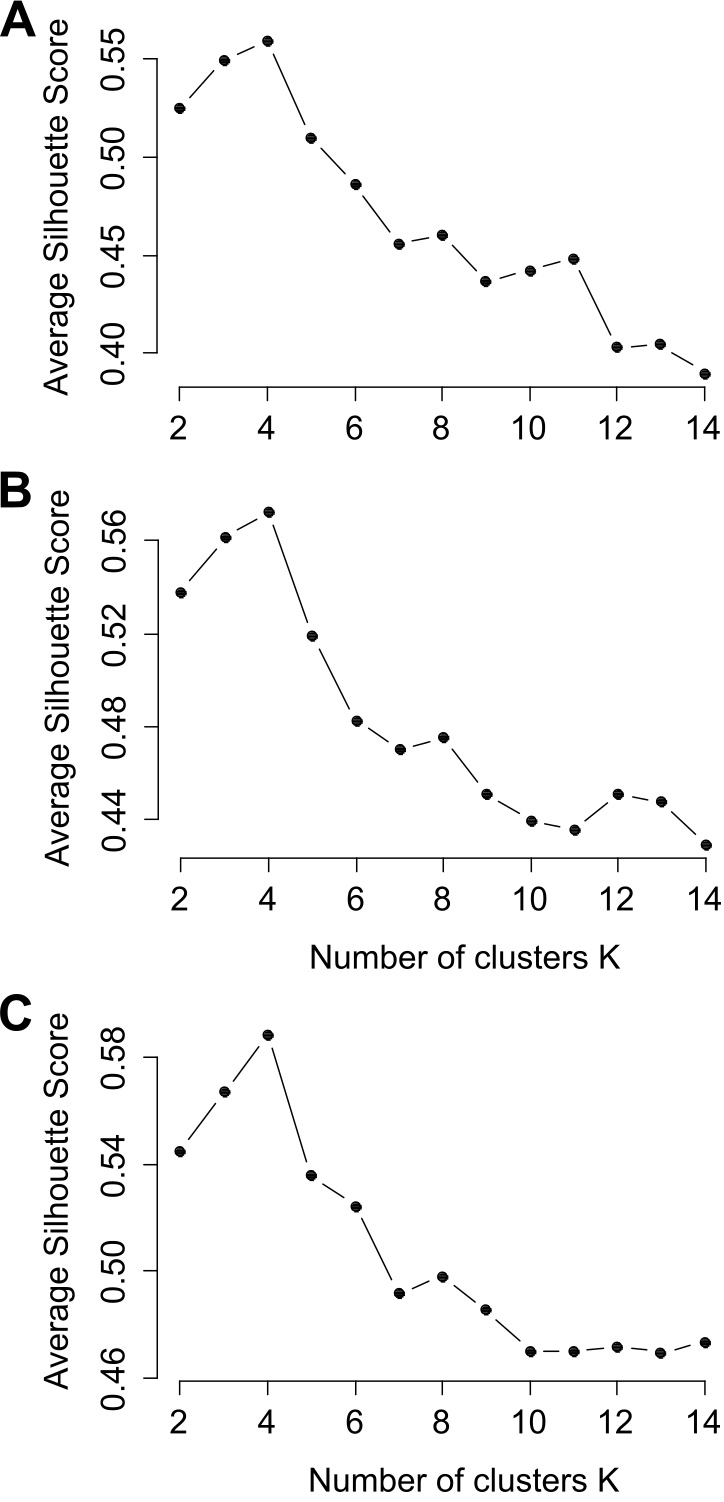
Supplementary Figure 2. Silhouette score according to the number of clusters (in a k-means clustering approach) in sample 1 (A), sample 2 (B) and sample 3 (C).**

**Supplementary Figure 3. Flow chart of participant selection**


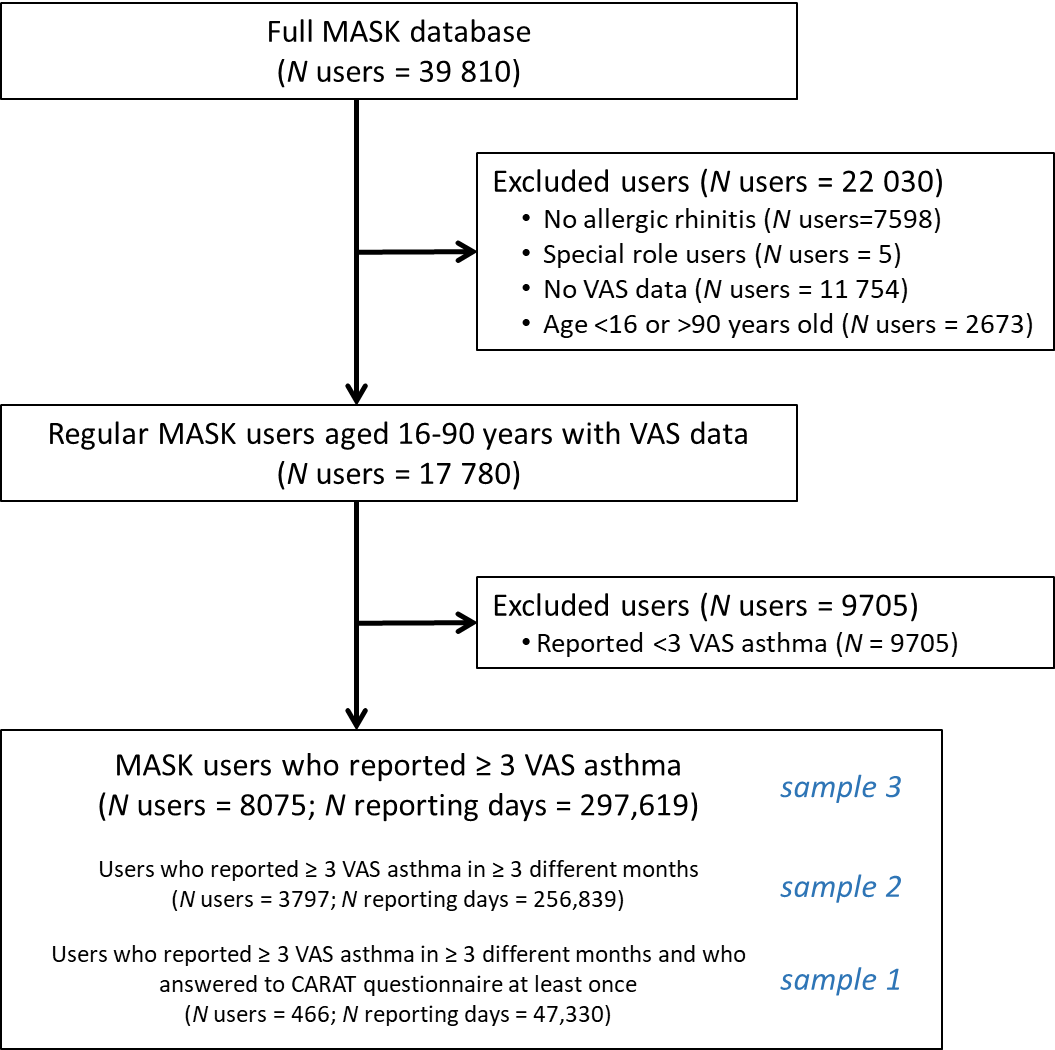


**Supplementary Figure 4. Graphical representation of the characteristics of the different clusters**

Percentages and absolute frequencies were calculated based on data from patients reporting VAS asthma in at least 3 different months – Sample 2

**
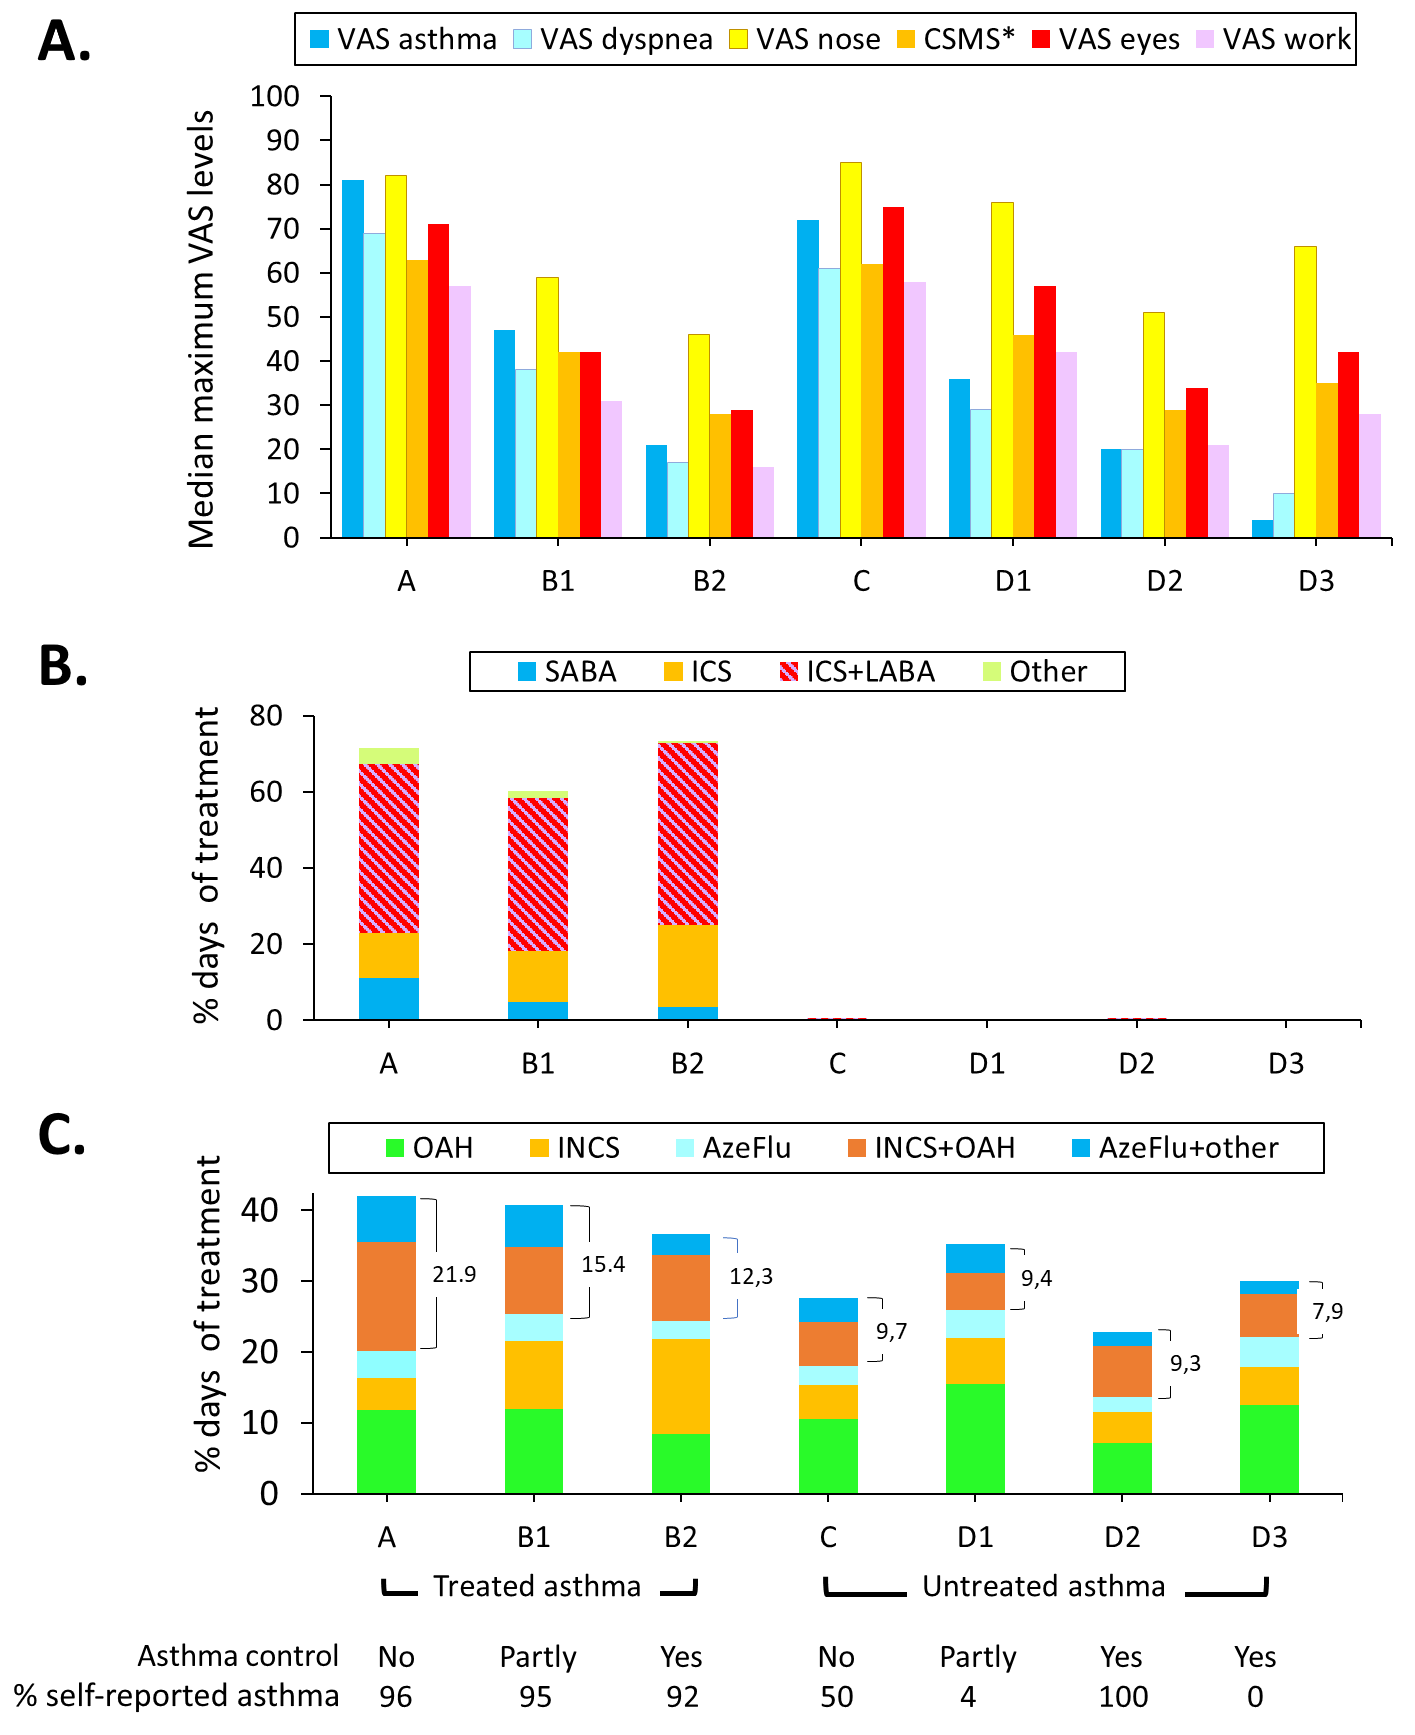
**

AzeFlu – Azelastine-fluticasone; CSMS – Combined-symptom medication score; ICS – Intranasal steroids; LABA – Long-acting beta agonist; OAH – Oral antihistamines; SABA – Short-acting beta-agonist; VAS – Visual analogue scale

**Supplementary Figure 5. Seasonal distribution of visual analogue scale (VAS) on asthma and on combined symptom-medication score levels by cluster**

**
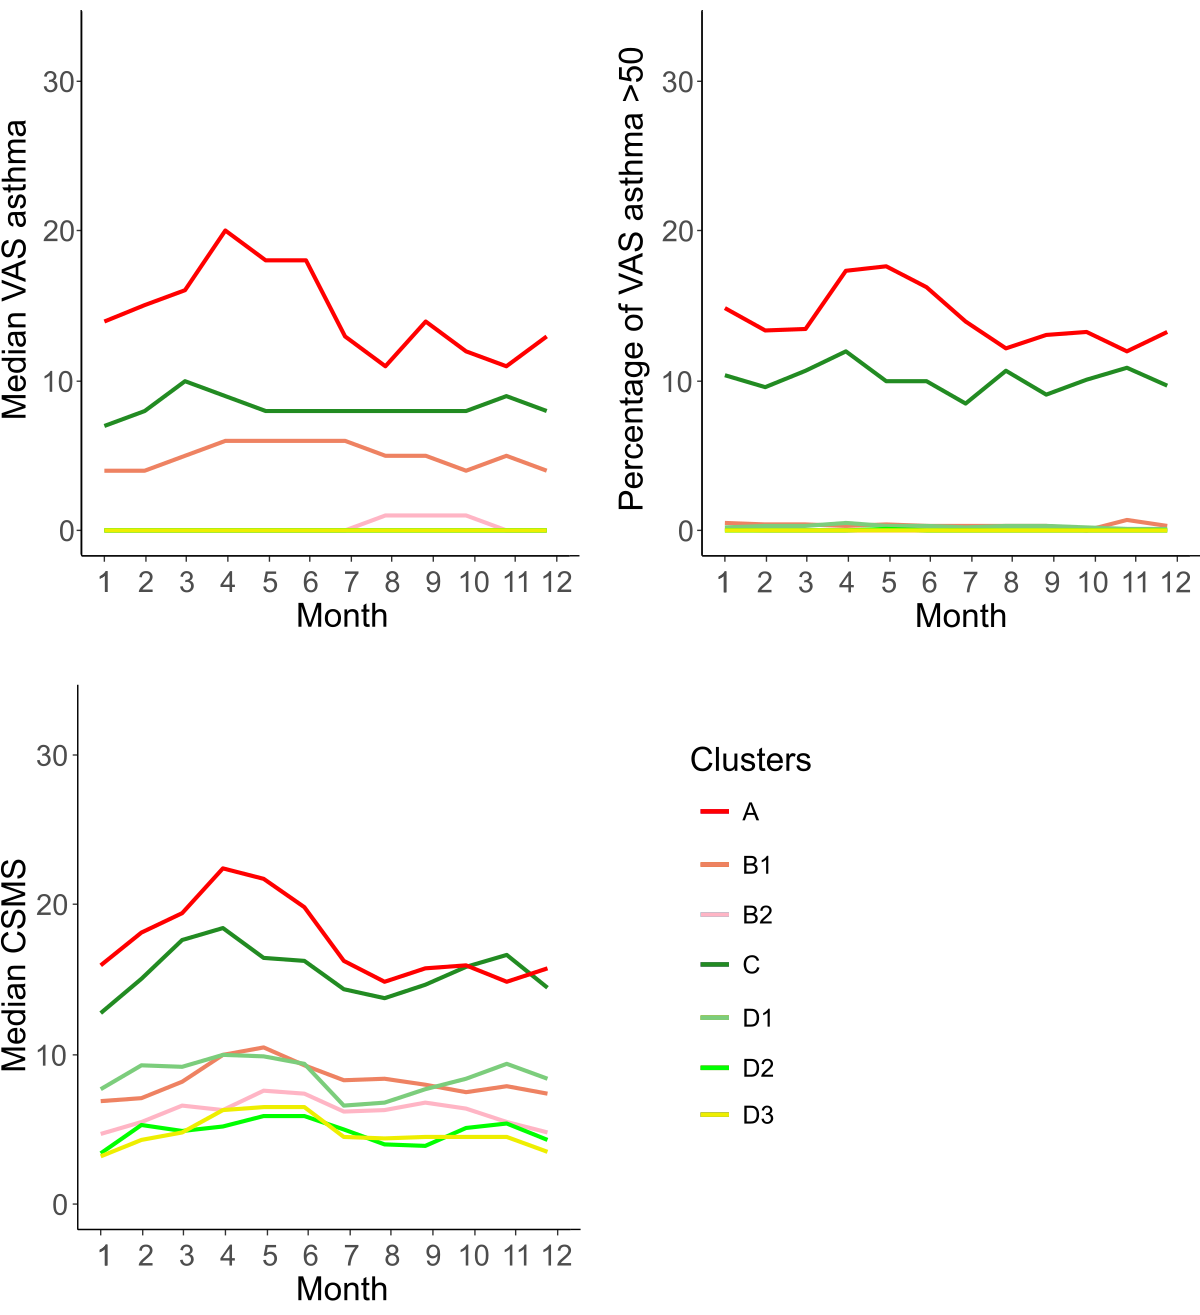
**

**Supplementary Figure 6. Median maximum visual analogue scale (VAS) and combined symptom-medication score (CSMS) levels according to the asthma cluster (data concerning patients reporting VAS asthma in at least 3 different months – sample 2)**


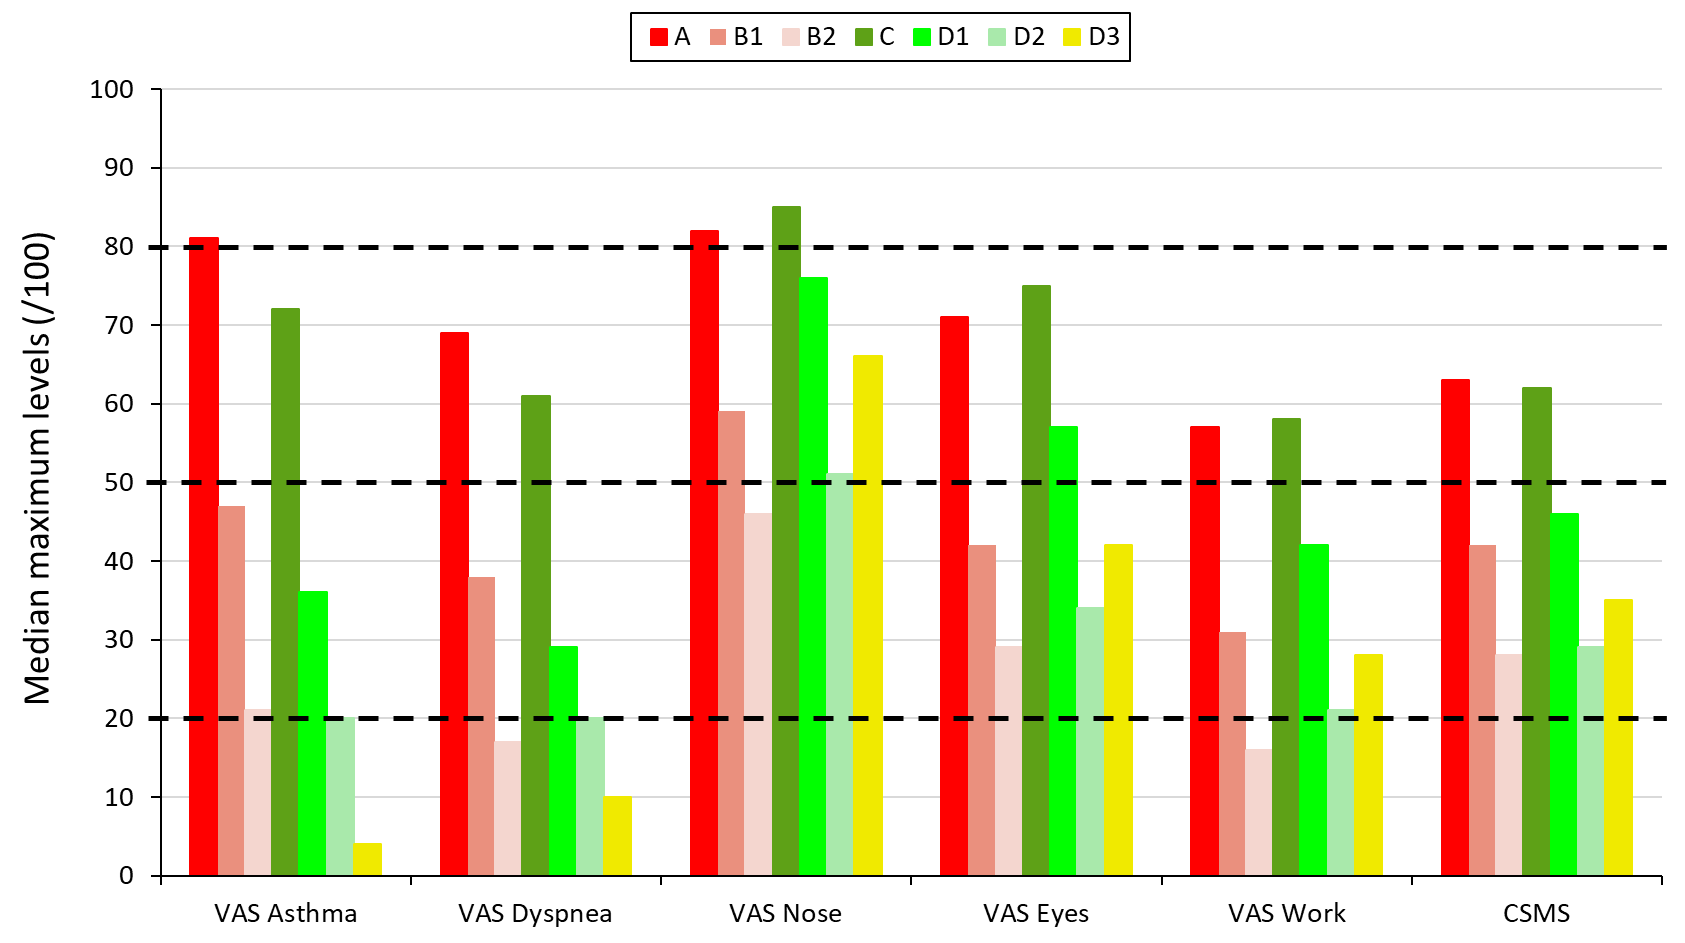

Supplement: mmc1 [file S2531043722002525:mmc1.doc]
